# Supplementary material for: 2-Pyridylmethyl-N-palmitoylglycine micelle-guided synthesis of a recyclable CuO@SiO2 nanocatalyst for hydride transfer nitro reduction in water
Source: Royal Society of Chemistry journal article supplement (doi:10.1039/d3nj02896h), 2023-01-01
Supplement: d3nj02896h1.pdf [file d3nj02896h1.pdf]

*Supporting information*

**2-pyridylmethyl-N-palmitoylglycine micelles guided synthesis of recyclable**

**CuO@SiO<sub>2</sub> nanocatalyst for hydride transfer nitro reduction in water**

Aleena Pious<sup>a</sup>, Ragavi S<sup>a</sup>, Ravi Kanth Kamlekar<sup>b</sup>, Mariappan Mariappan<sup>c</sup>, Veerappan

Anbazhagan<sup>a</sup>

<sup>a</sup>Department of Chemistry, School of Chemical and Biotechnology, SASTRA Deemed

University, Thanjavur - 613 401, Tamil Nadu, India.

<sup>b</sup>Department of Chemistry, School of Advanced Sciences, VIT, Vellore, Tamil Nadu, India

<sup>c</sup>Department of Chemistry, SRM Institute of Science & Technology, Kattankulathur,

Tamil Nadu 603203

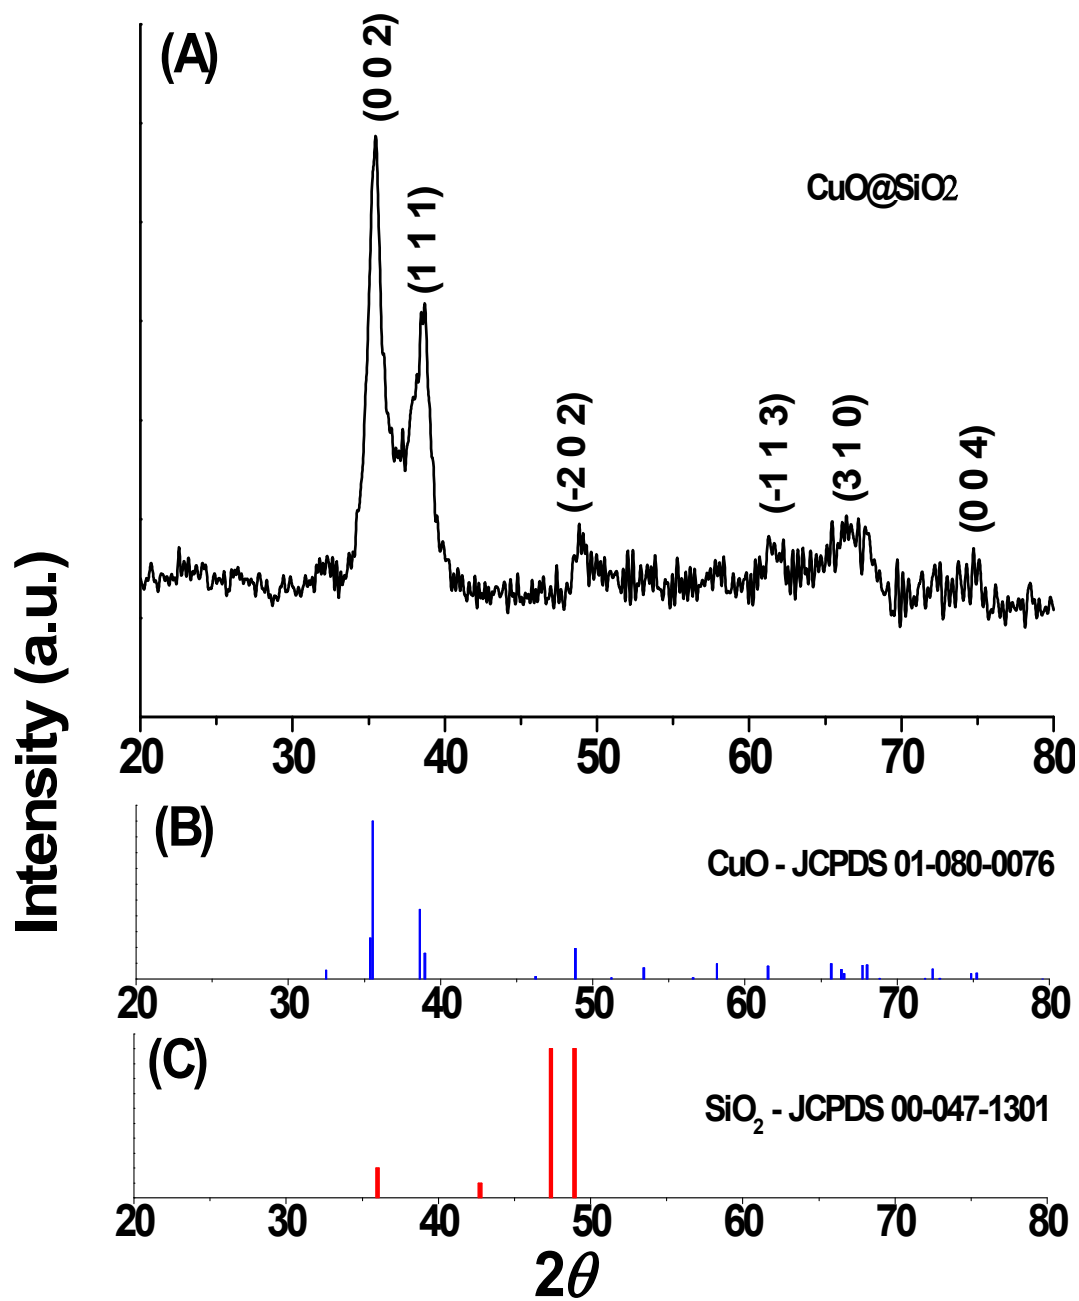

Fig. S1: XRD results of CuO@SiO<sub>2</sub>. The peaks are matching to the monoclinic crystallites of CuO.

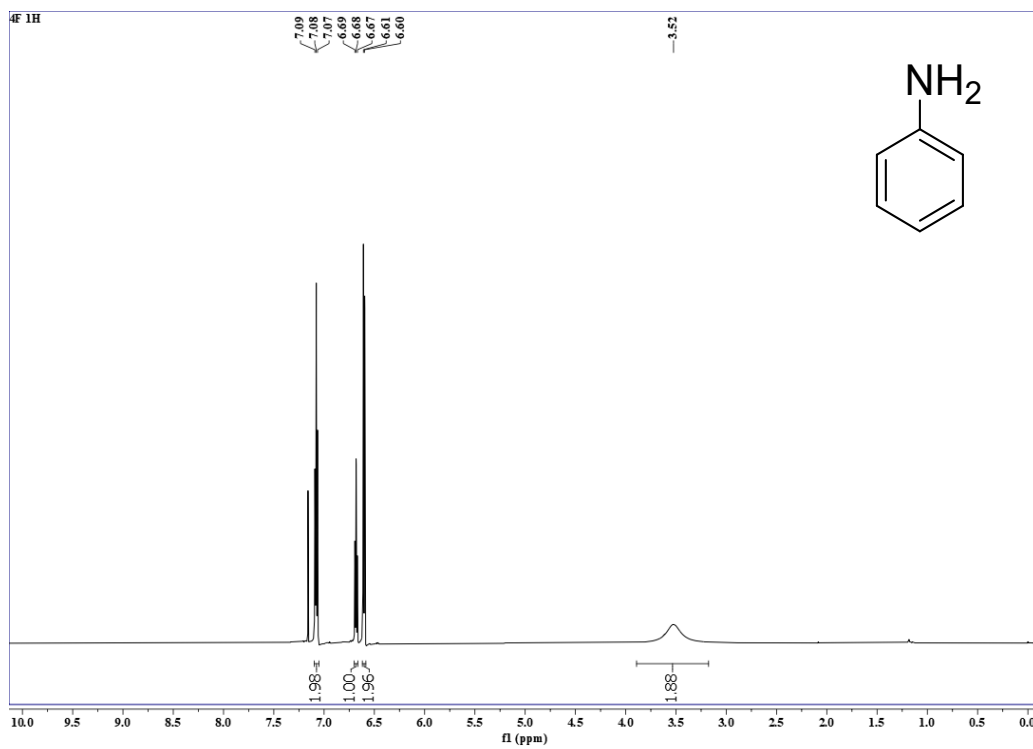

**Entry 1.** Aniline- (300 MHz,  $\text{CDCl}_3$ )  $\delta$  7.08 (2H,t,  $J = 4.0$  Hz), 6.68 (1H,t,  $J = 3.9$  Hz), 6.60 (2H,d,  $J = 3.7$  Hz), 3.52(2H,s).

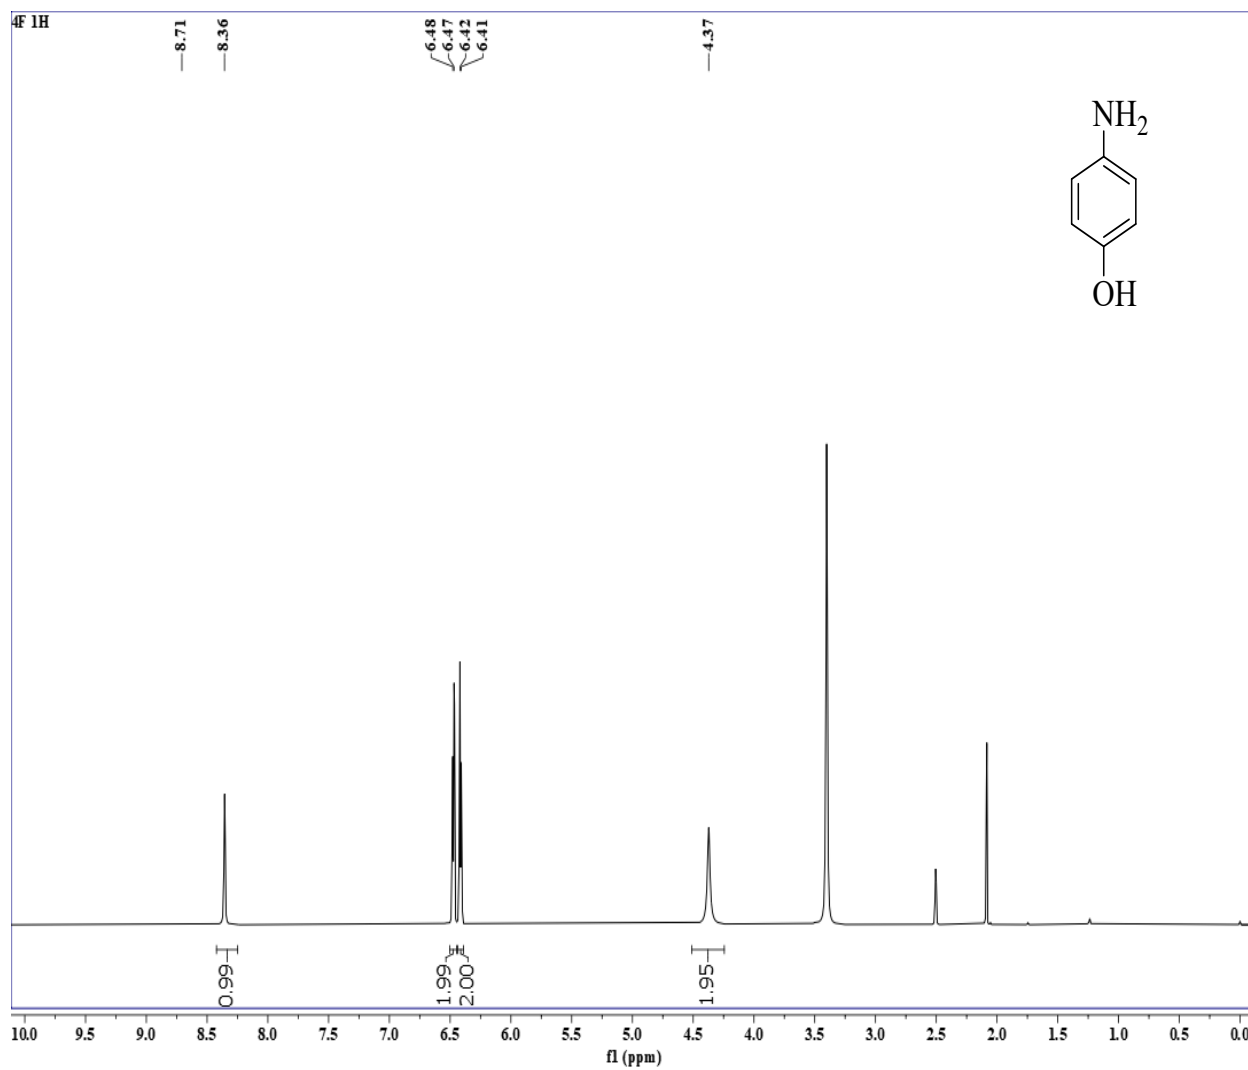

**Entry 2.** 4-aminophenol – (300 MHz, DMSO-D<sub>6</sub>)  $\delta$  8.36(1H,s), 6.47 (2H,d,  $J$  = 3.2 Hz), 6.41 (2H,d,  $J$  = 3.2 Hz), 4.37(1H,s).

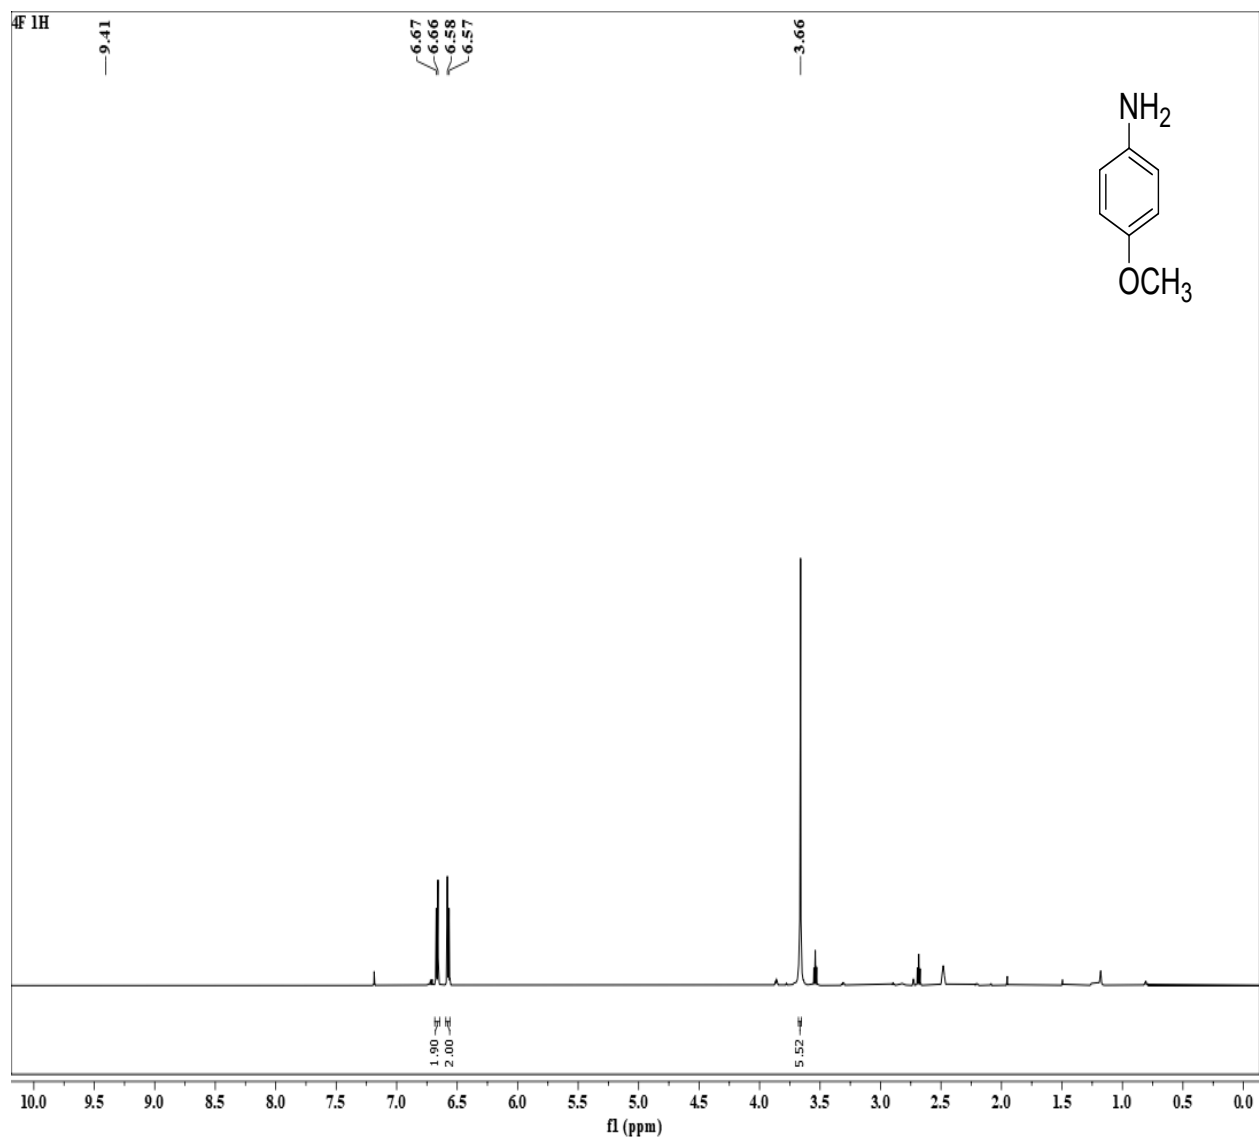

**Entry 3.** 4-methoxyaniline (300 MHz, CDCl<sub>3</sub>)  $\delta$  6.67 (2H, d,  $J = 4.4$  Hz), 6.57 (2H, d,  $J = 4.4$  Hz), 3.66 (5H, s).

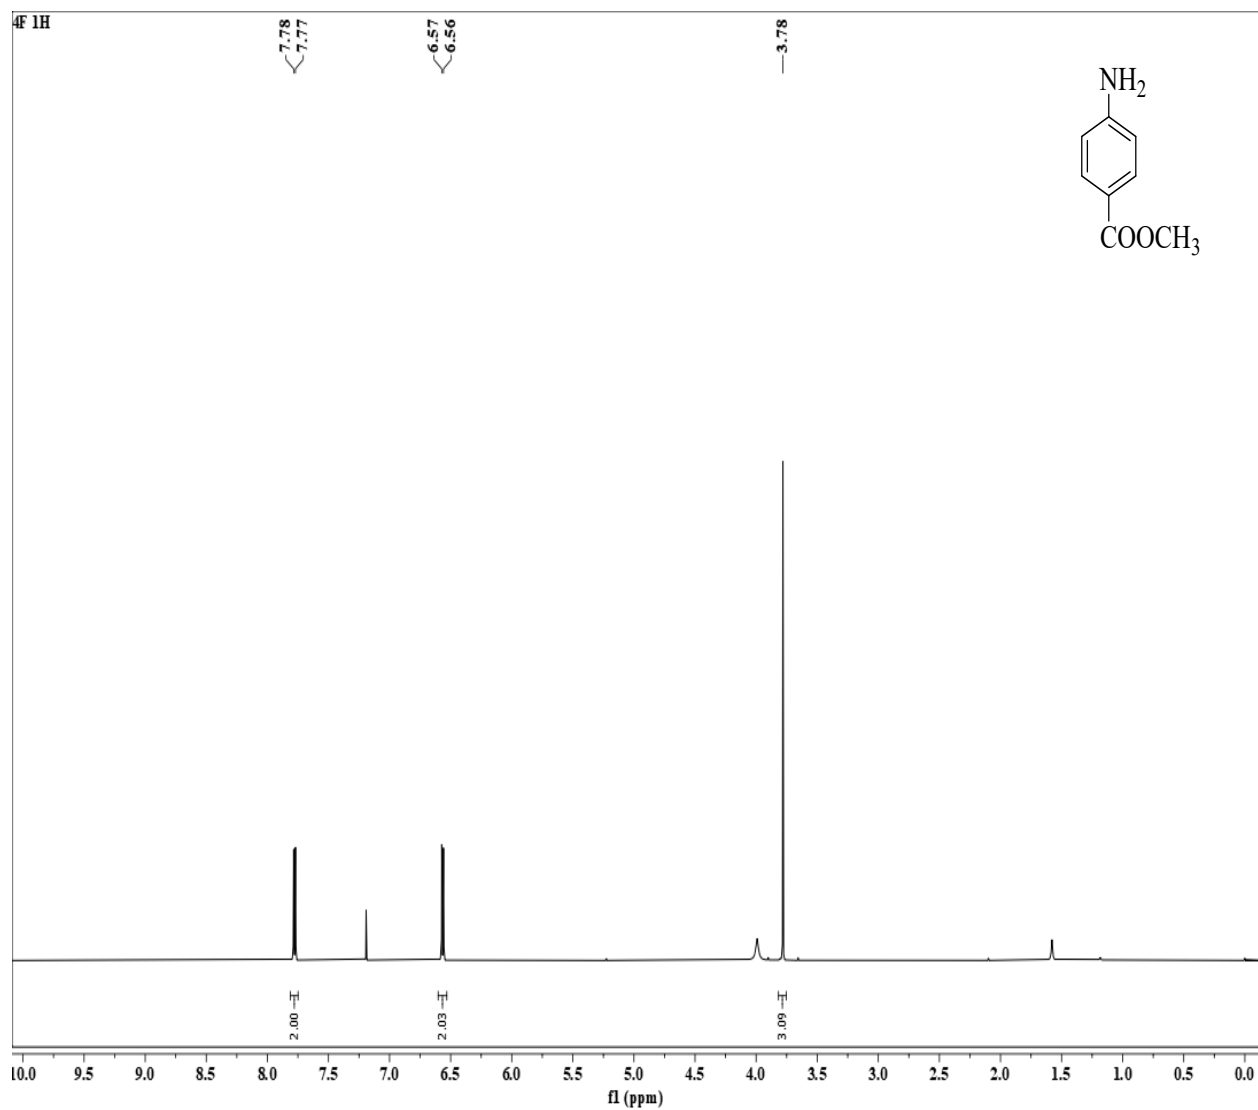

**Entry 4.** Methyl-4-aminobenzoate (300 MHz, CDCl<sub>3</sub>)  $\delta$  7.78 (2H, d,  $J = 4.3$  Hz), 6.57 (2H, d,  $J = 4.3$  Hz), 3.78 (3H, s).

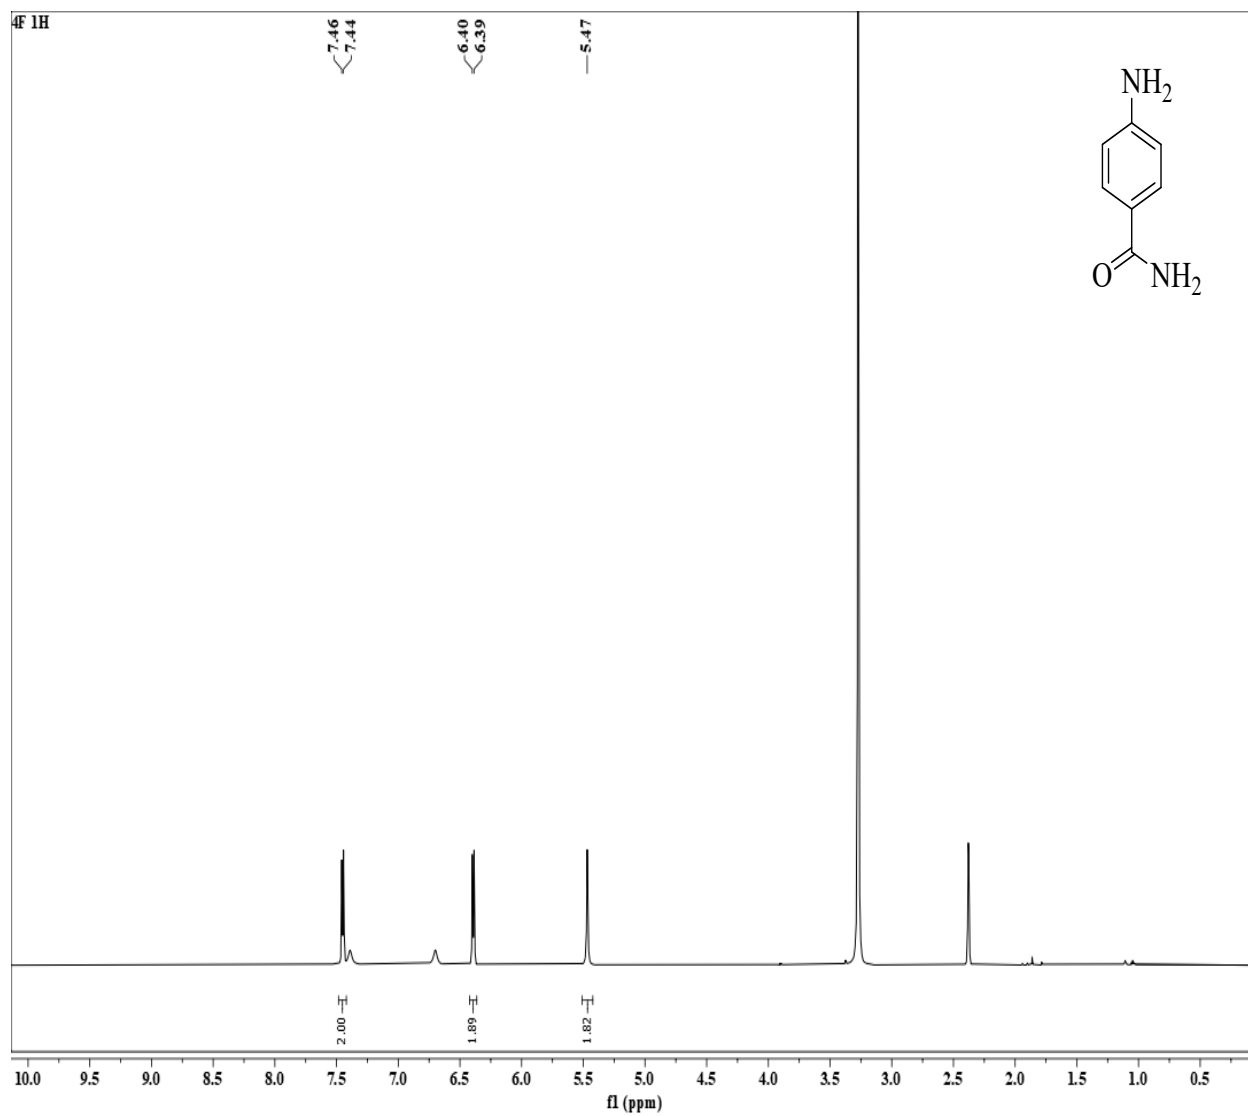

**Entry 5.** 4-aminobenzamide NMR (300 MHz, -DMSO-D6)  $\delta$  7.45 (2H,d,  $J = 4.3$  Hz), 6.39 (2H,d,  $J = 4.4$  Hz), 5.47 (2H,s).

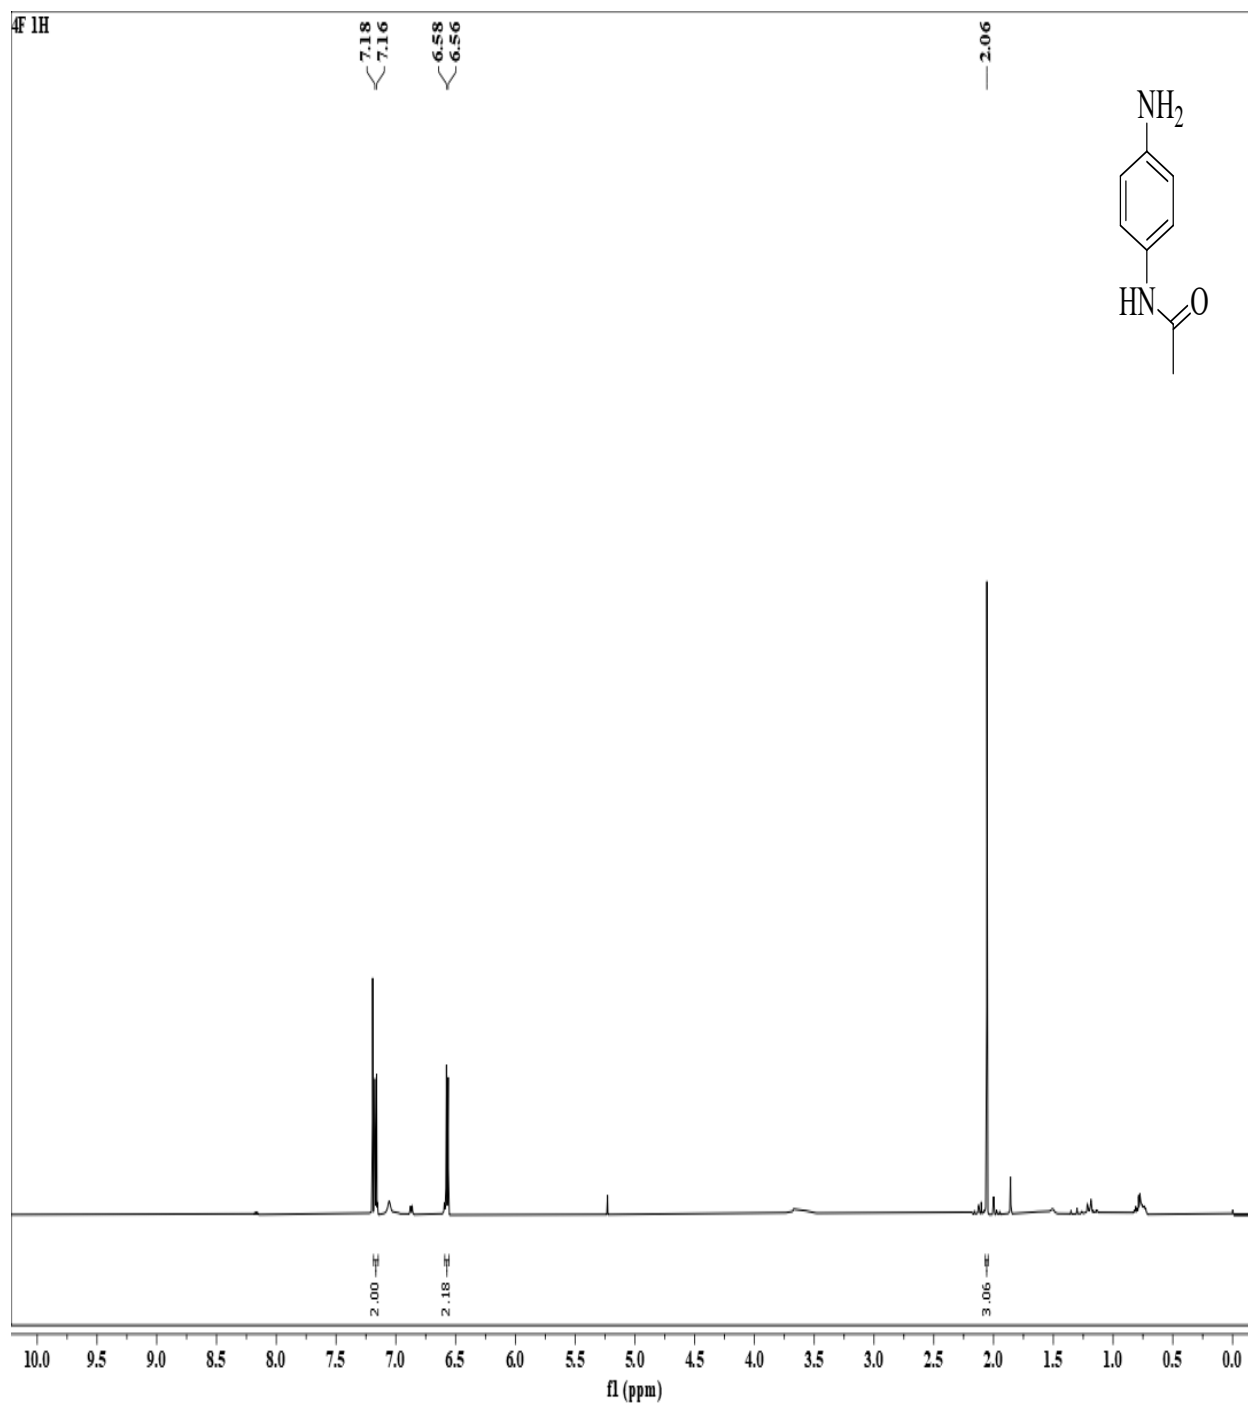

**Entry 6.** N-(4-aminophenyl)acetamide (300 MHz, CDCl<sub>3</sub>)  $\delta$  7.17 (2H,d,  $J = 4.4$  Hz), 6.57 (2H, d,  $J = 4.4$  Hz)(3H,s).



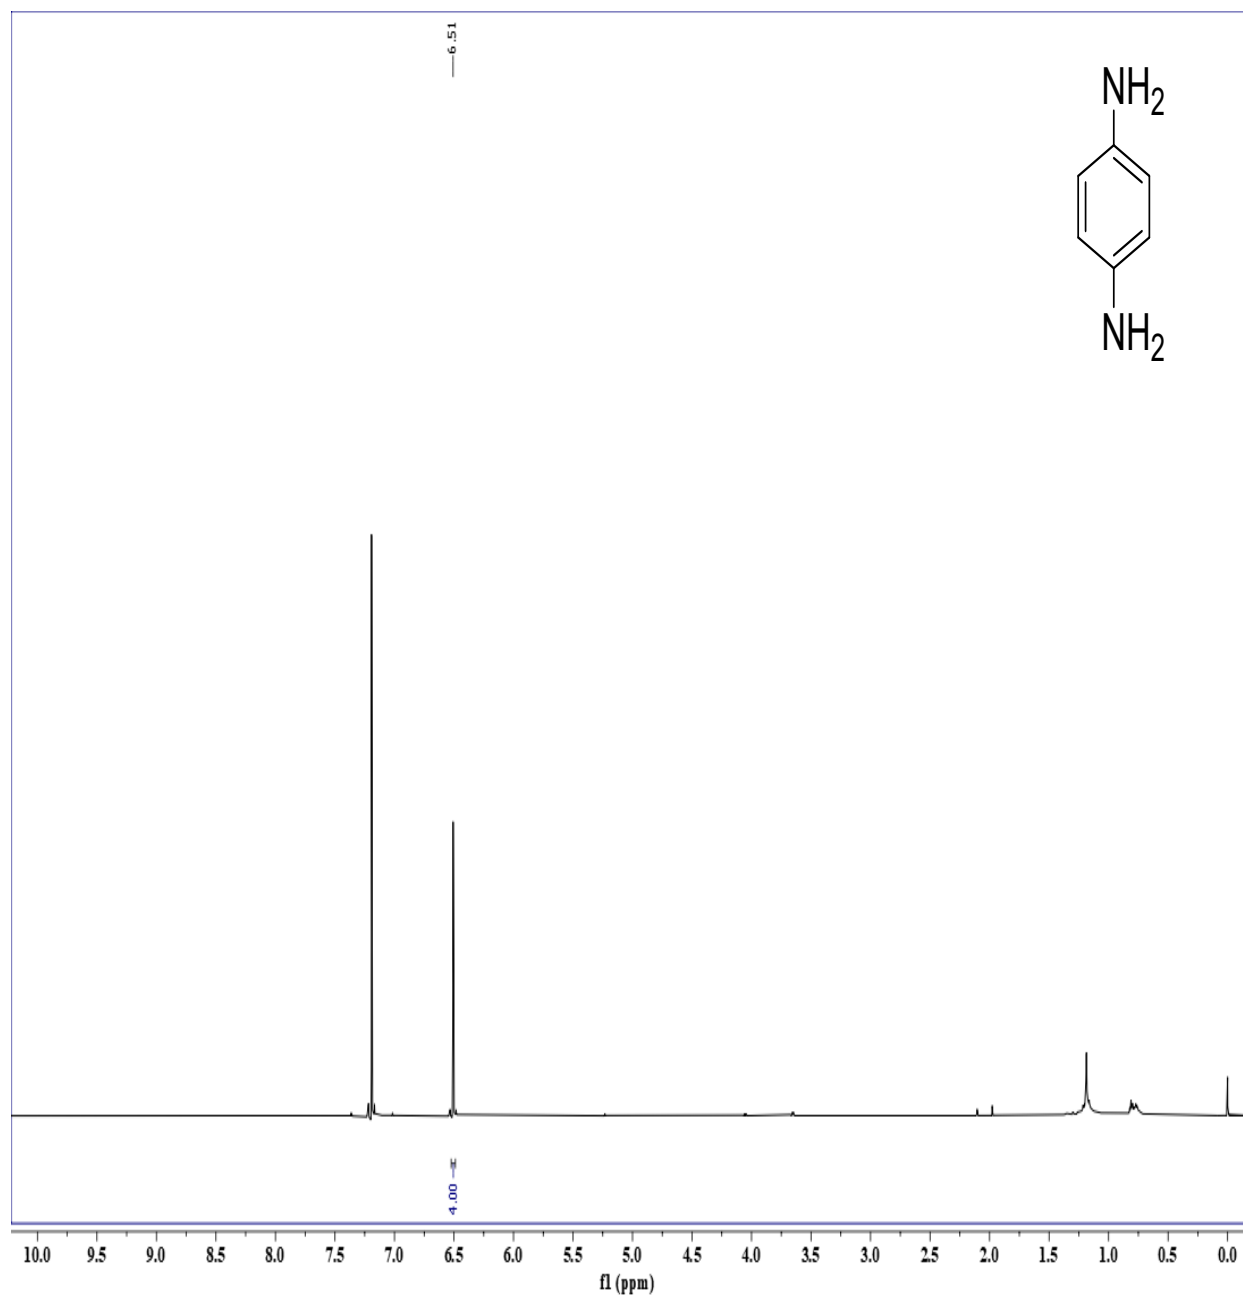

**Entry 7.** Benzene-1,4-diamine (300MHz, CDCl<sub>3</sub>)- 6.5(4H,s).

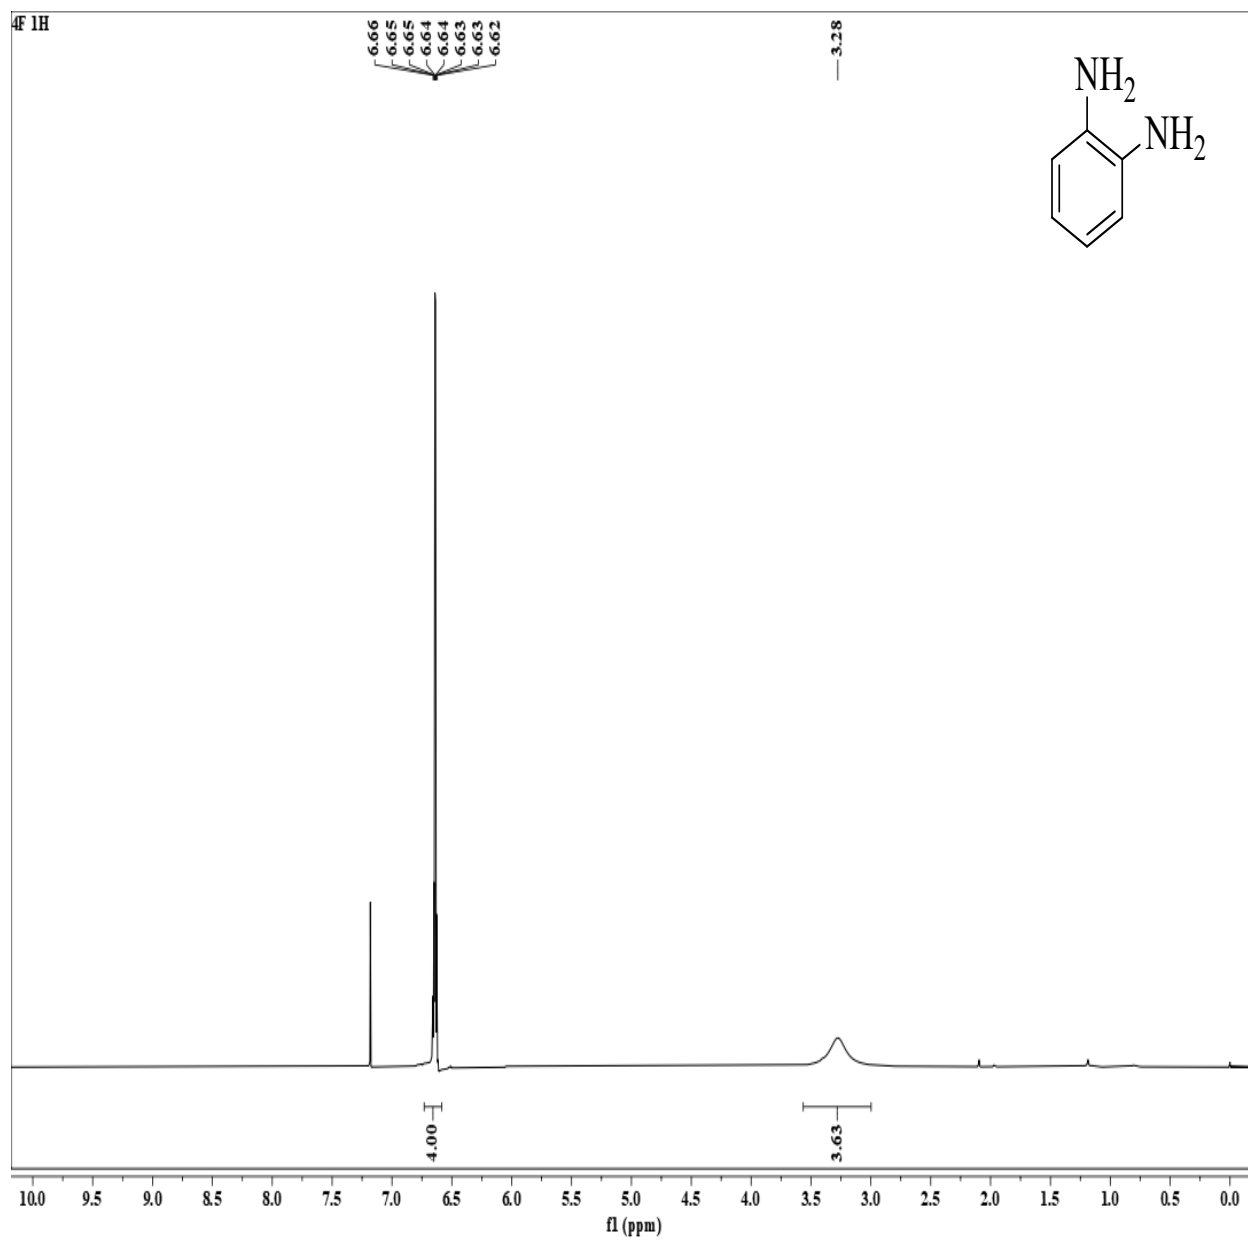

**Entry 8.** Benzene-1,2-diamine- (300MHz,  $\text{CDCl}_3$ )- 6.64(4H,m), 3.28(4H,s).

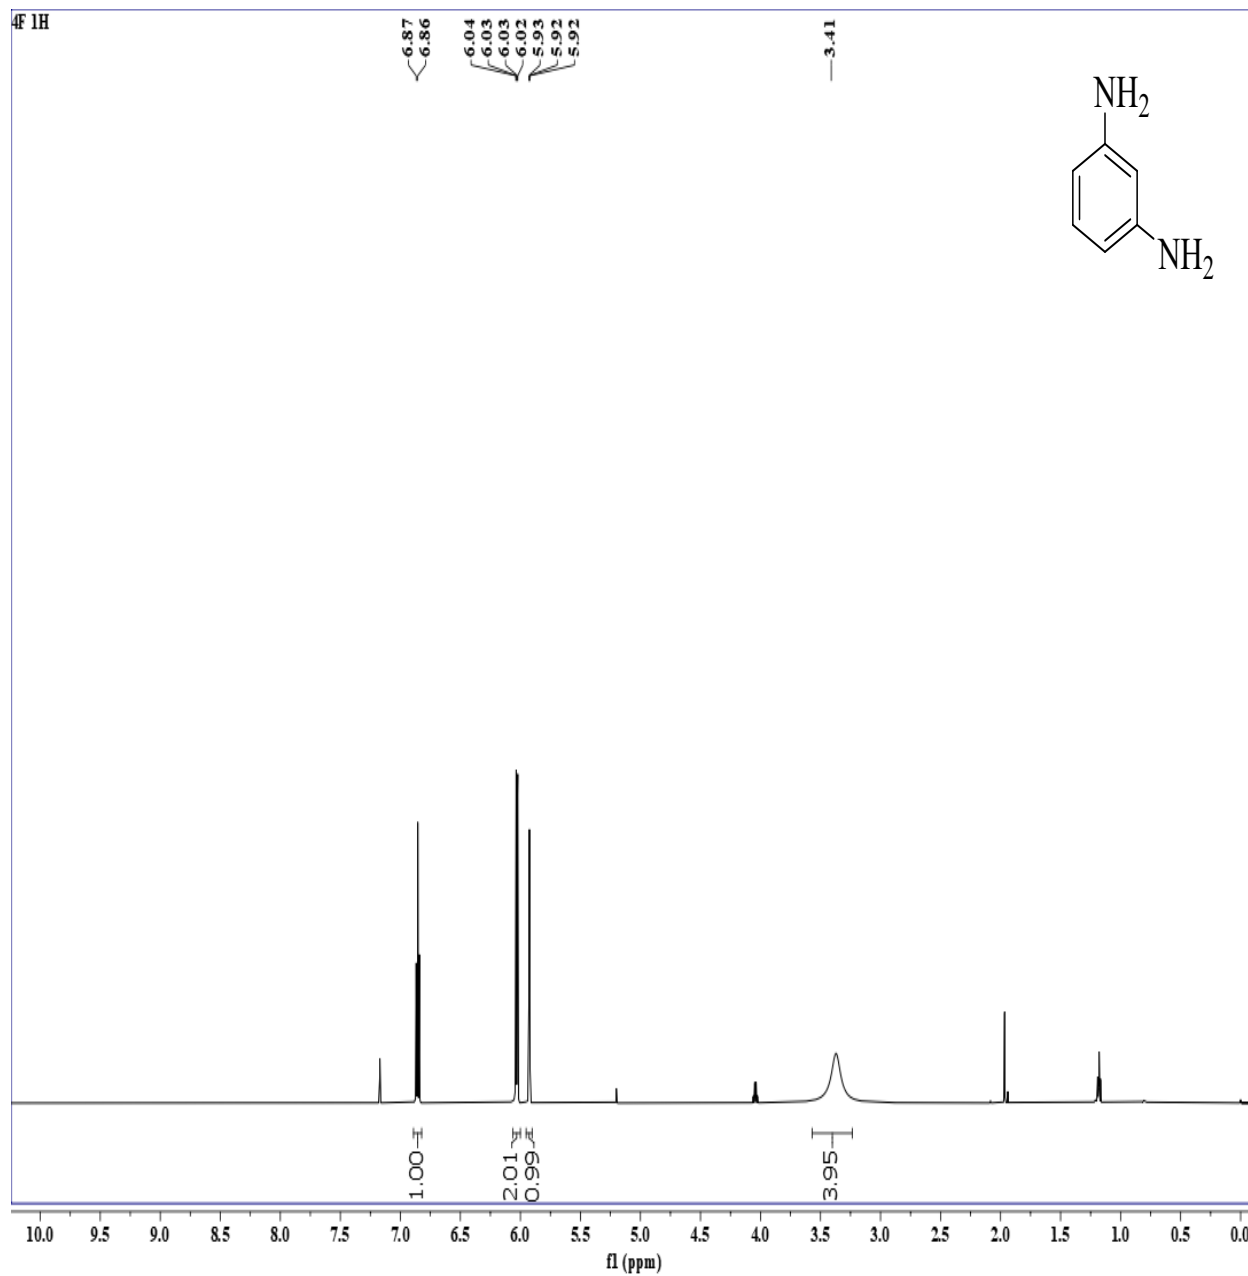

**Entry 9.** Benzene-1,3-diamine (300 MHz,  $\text{CDCl}_3$ )  $\delta$  6.86 (1H,d,  $J = 3.9$  Hz), 6.03 (2H,dd,  $J = 3.9, 1.1$  Hz), 5.92 (1H,t,  $J = 1.1$  Hz), 3.41(4H,s).

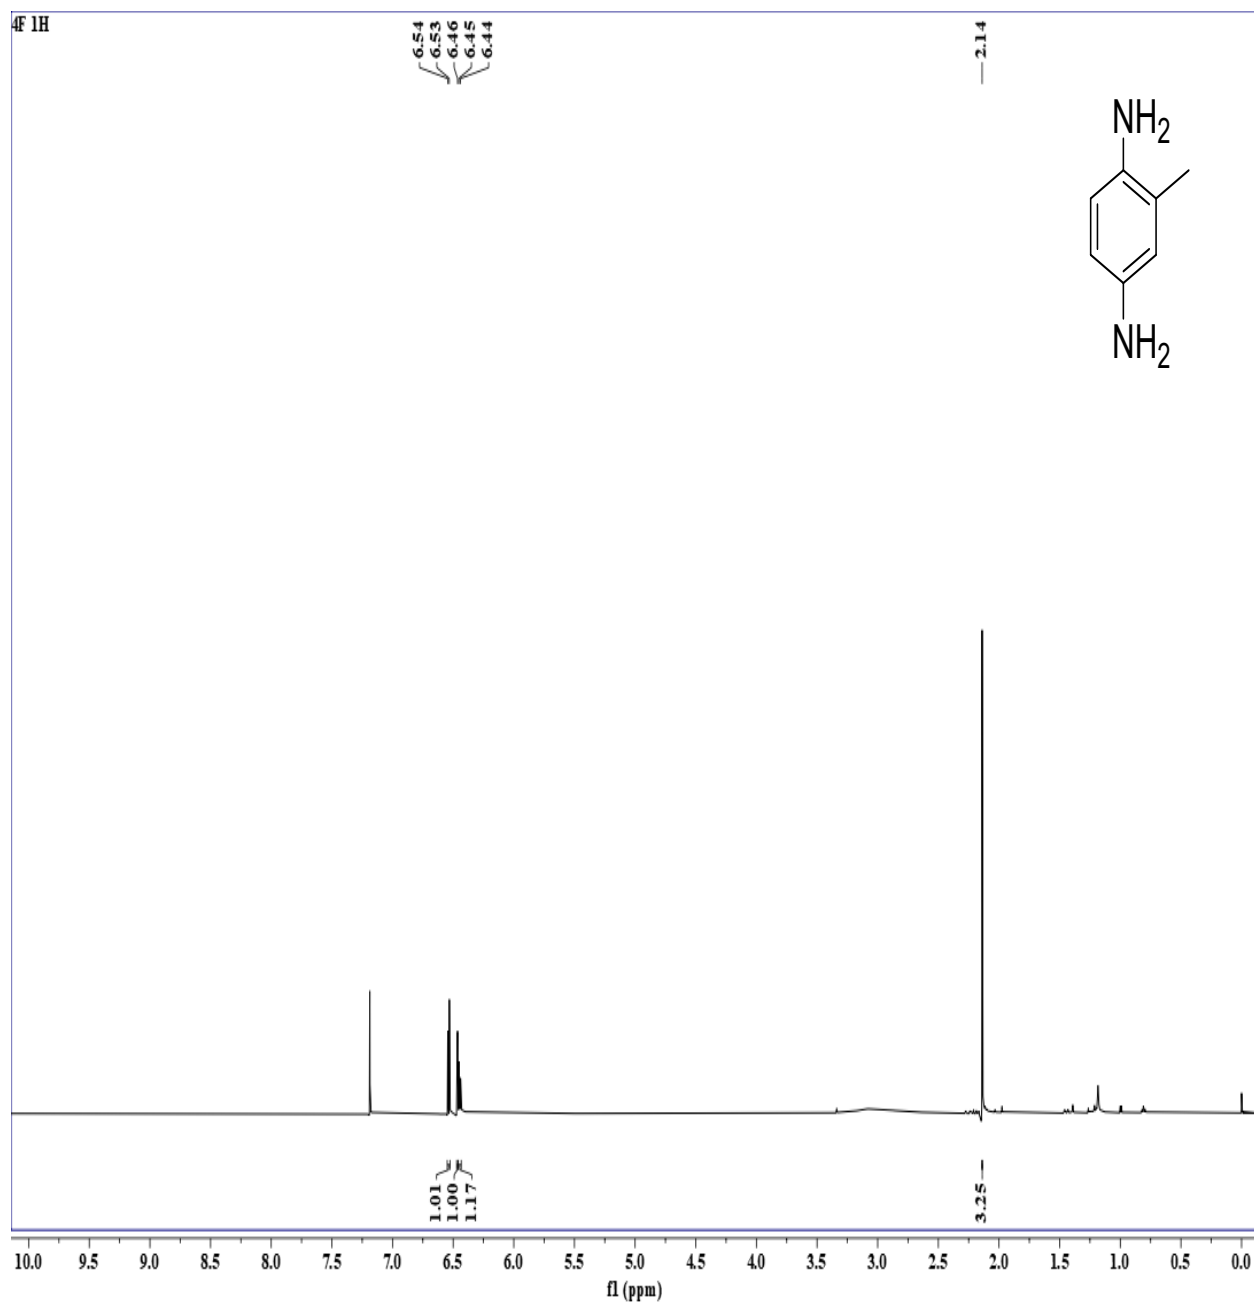

**Entry 10.** 2-methylbenzene-1,4-diamine- (300 MHz,  $\text{CDCl}_3$ )  $\delta$  6.54 (1H,d,  $J = 3.8$  Hz), 6.46(1H,s), 6.45 (1H,d,  $J = 4.0$  Hz), 2.14(3H,s).

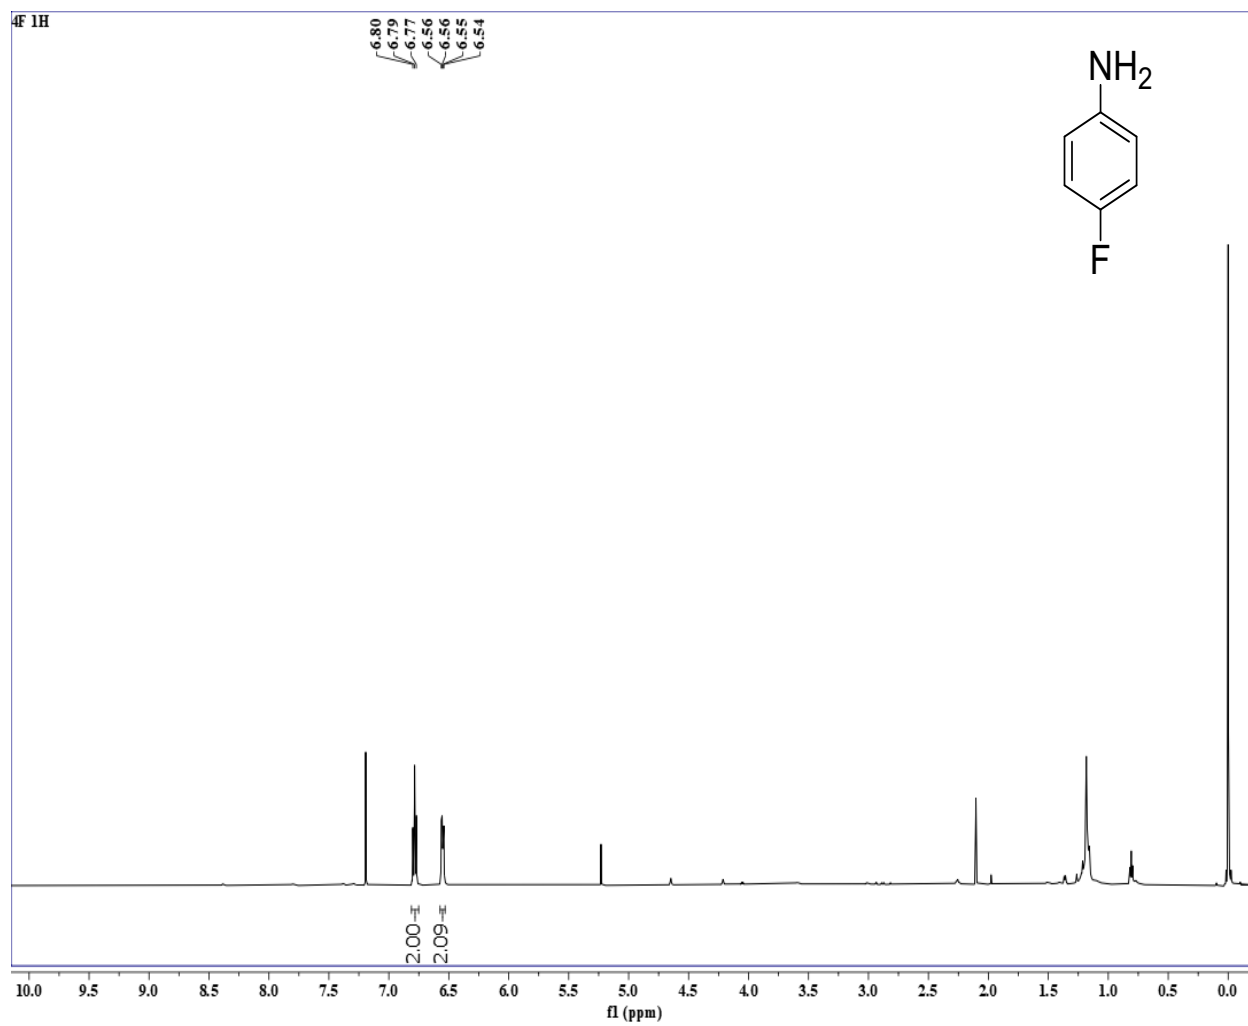

**Entry 11.** 4-fluoroaniline- (300 MHz,  $\text{CDCl}_3$ )  $\delta$  6.79 (2H, t,  $J = 4.4$  Hz), 6.55 (2H, dd,  $J = 4.5$ , 2.2 Hz).

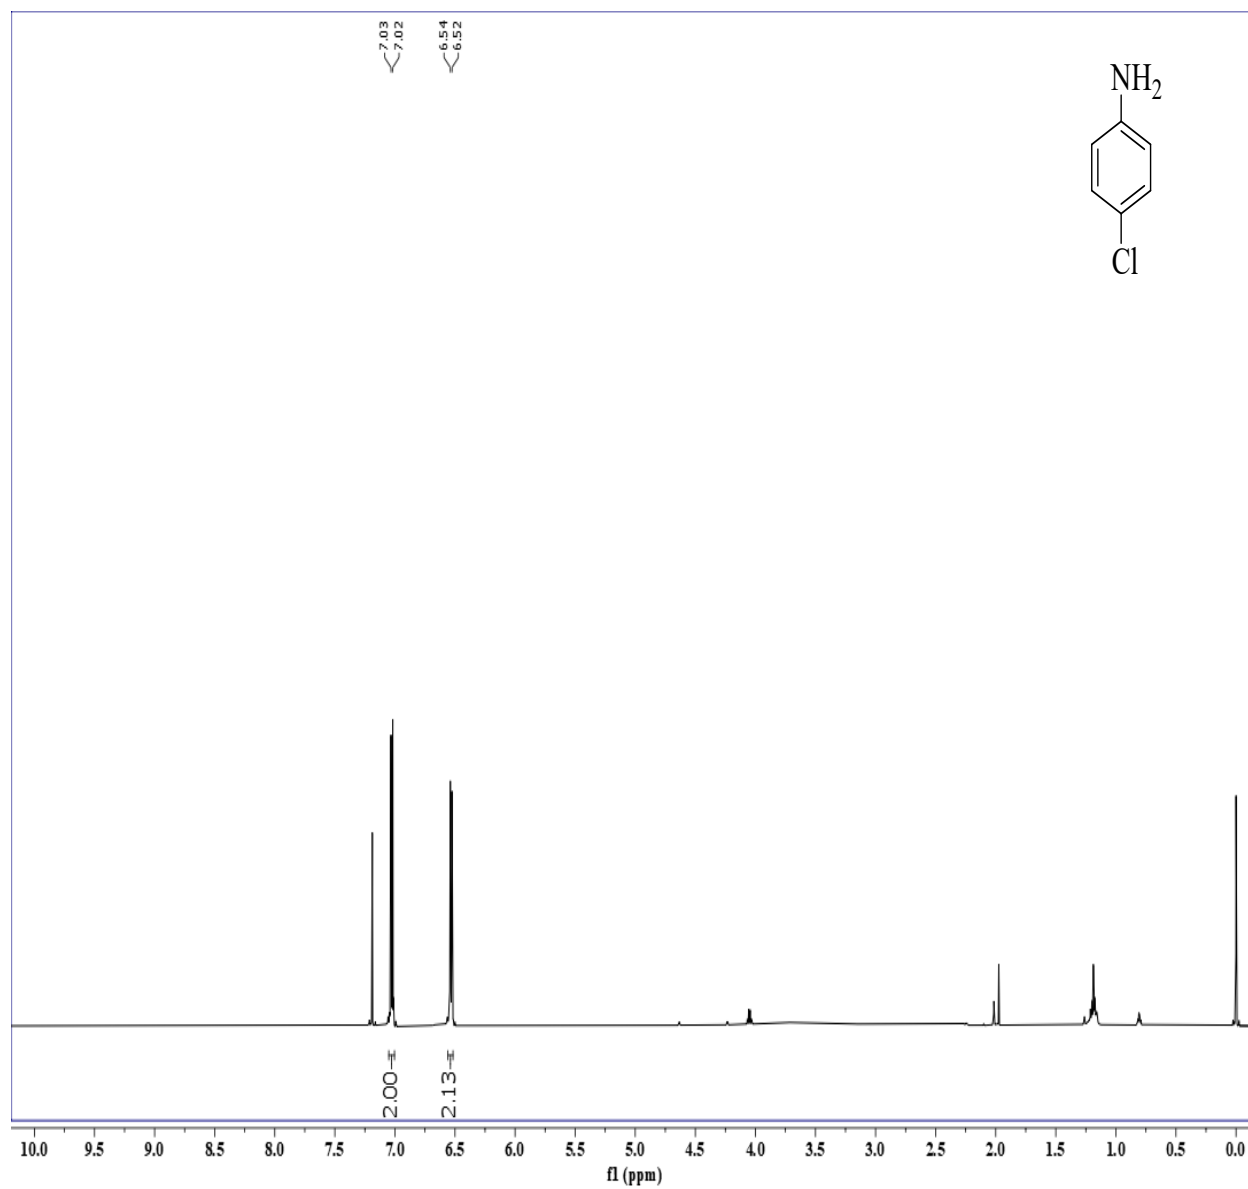

**Entry 12.** 4-Chloroaniline- (300 MHz,  $\text{CDCl}_3$ )  $\delta$  7.03 (2H, d,  $J = 4.5$  Hz), 6.53 (2H, d,  $J = 4.3$  Hz).

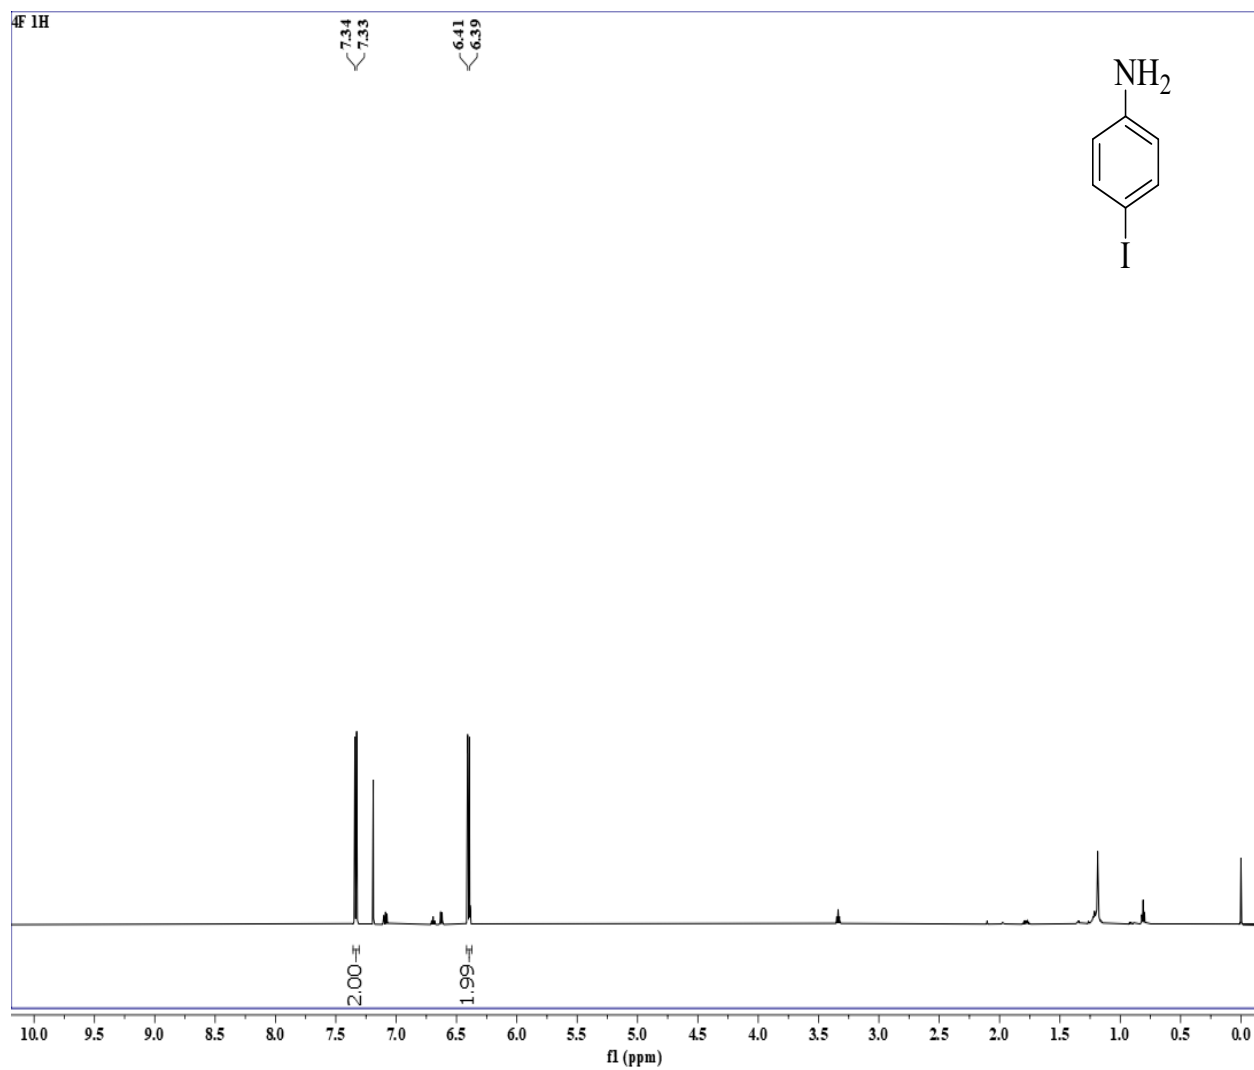

**Entry 13.** 4-iodoaniline- (300 MHz, )  $\delta$  7.33 (2H,d,  $J = 4.4$  Hz), 6.40 (2H,d,  $J = 4.4$  Hz).

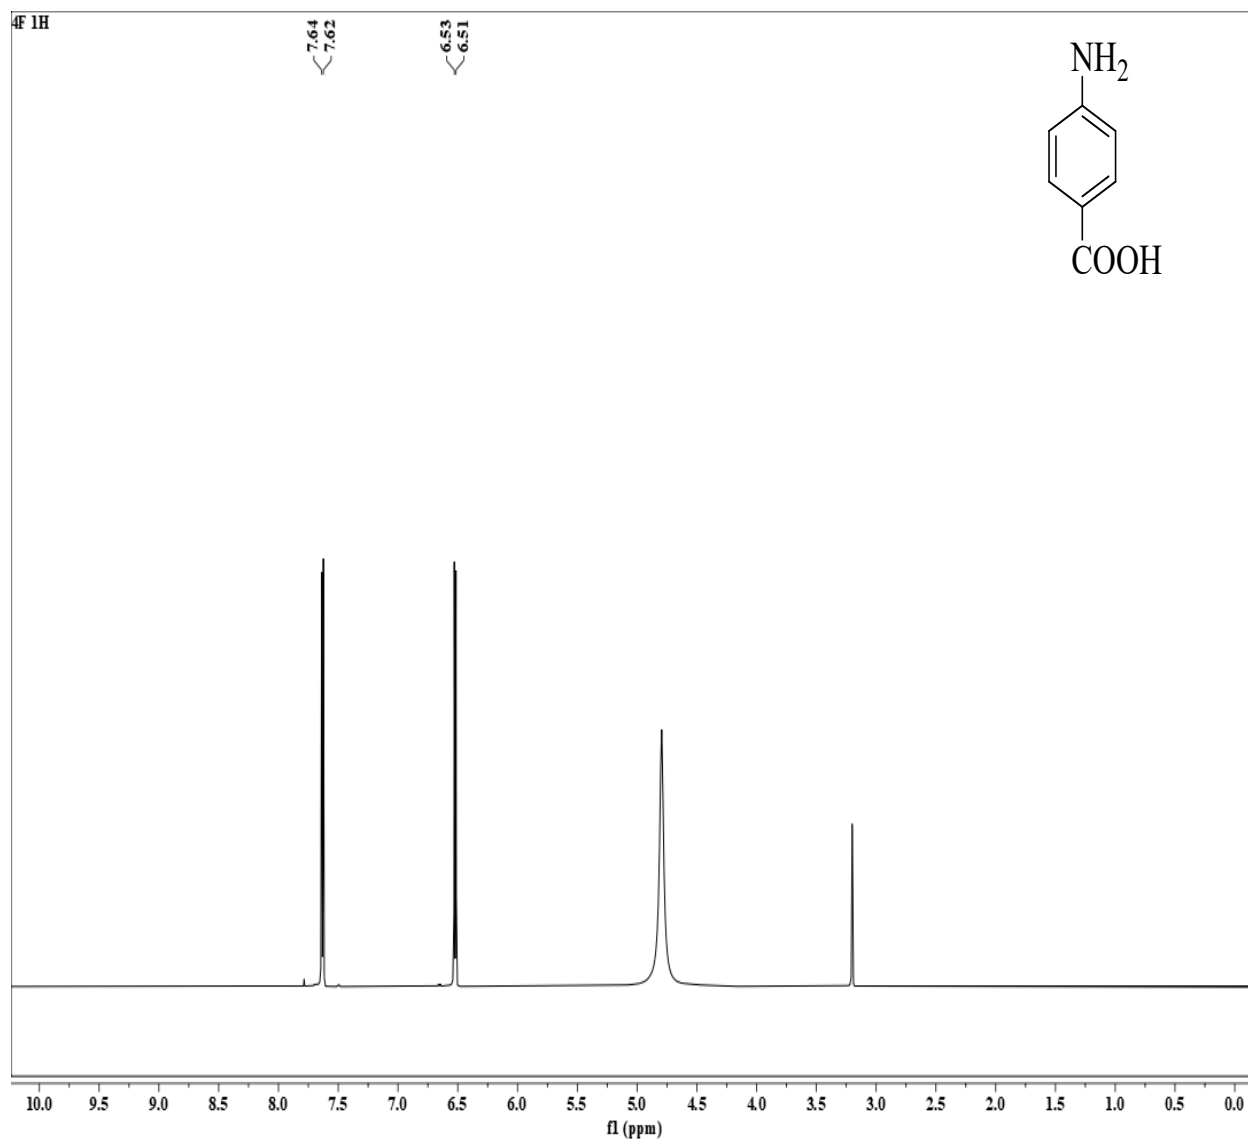

**Entry 14.** 4-aminobenzoic acid (300 MHz, CH<sub>3</sub>OH-D<sub>4</sub>)  $\delta$  7.63 (2H, d,  $J = 4.2$  Hz), 6.52 (2H, d,  $J = 4.2$  Hz).



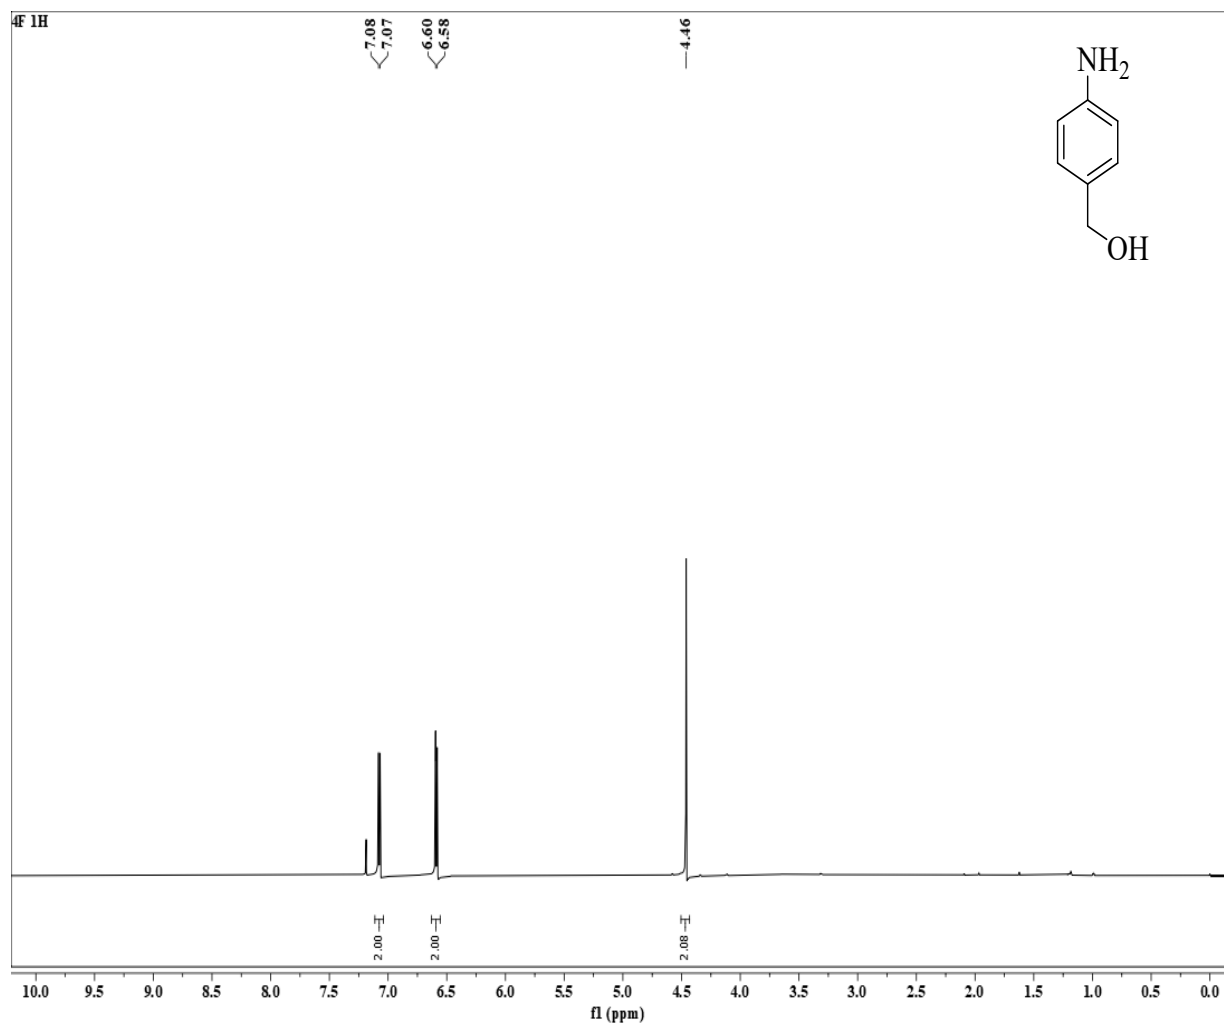

**Entry 15.** (4-aminophenyl)methanol (300 MHz, CDCl<sub>3</sub>)  $\delta$  7.07 (2H, d,  $J = 4.1$  Hz), 6.59 (2H, d,  $J = 4.1$  Hz), 4.46 (2H, s).

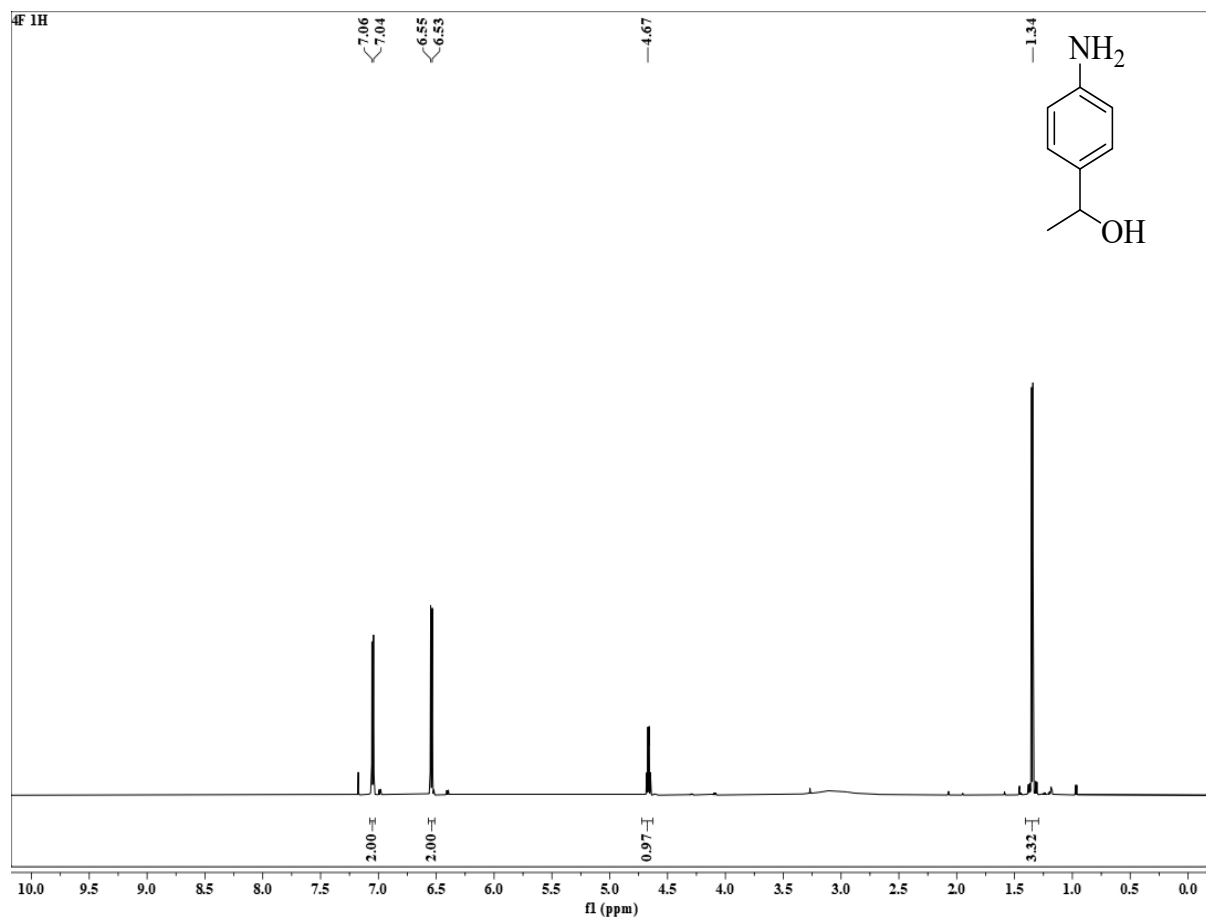

**Entry 16.** 1-(4-aminophenyl)ethan-1-ol (300 MHz, CDCl<sub>3</sub>)  $\delta$  7.05 (2H, d,  $J$  = 4.6 Hz), 6.54 (2H, d,  $J$  = 4.3 Hz), 4.66 (1H, q,  $J$  = 3.2 Hz), 1.35 (3H, d,  $J$  = 3.3 Hz).
